# Supplementary material for: Histone Tail Dynamics in Partially Disassembled Nucleosomes During Chromatin Remodeling
Source: PubMed Central journal article supplement (PMC6896900; doi:10.3389/fmolb.2019.00133), 2019-11-28
Supplement: Data_Sheet_1.pdf [file Data_Sheet_1.pdf]

# Supplementary Material

## SUPPLEMENTARY FIGURES

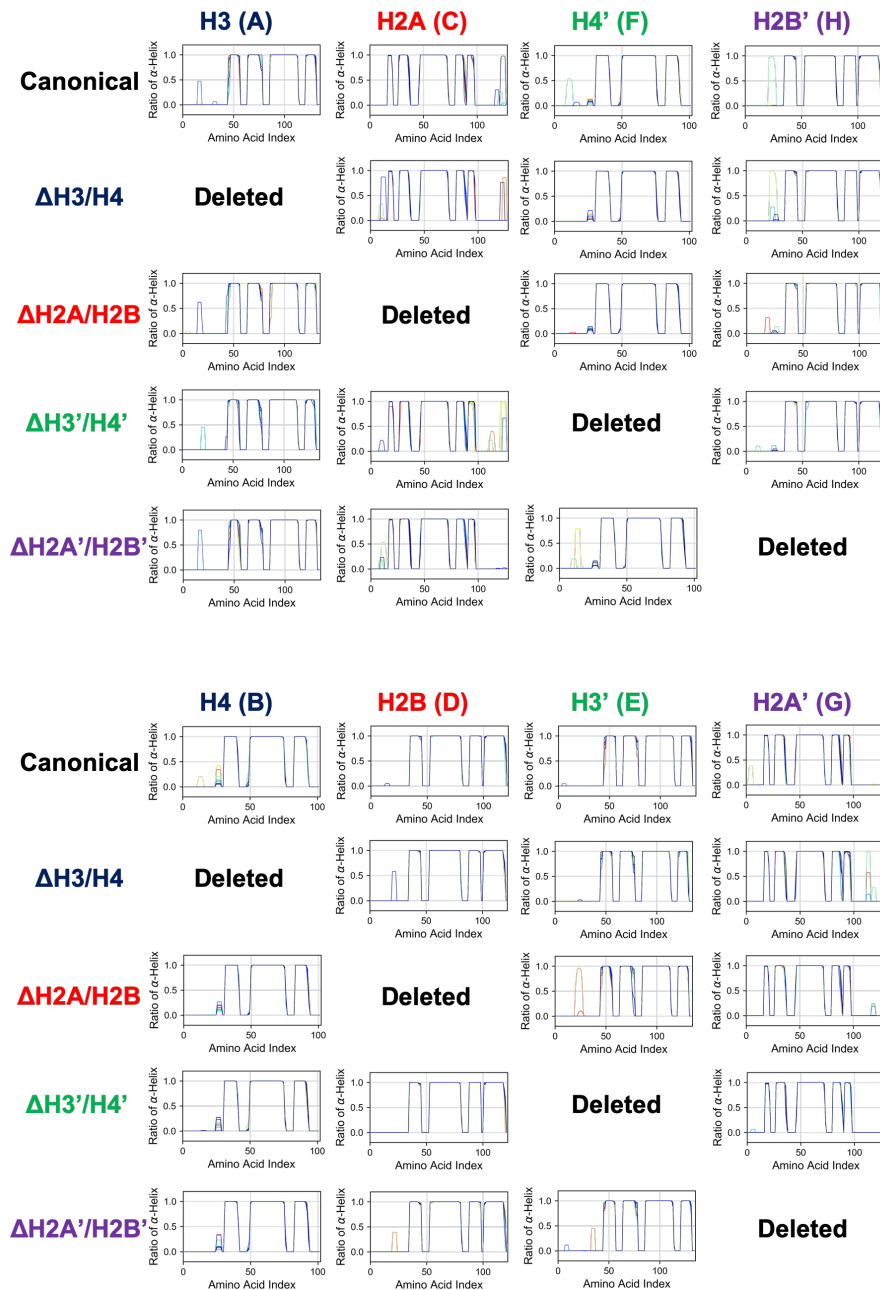

**Figure S1. Secondary Structure Stability of Histones in Each Nucleosome.** Horizontal and vertical axes of each graph show amino acid index and ratio of  $\alpha$ -helix formation in each histone, respectively. Colors show different simulation trajectories (total 10).

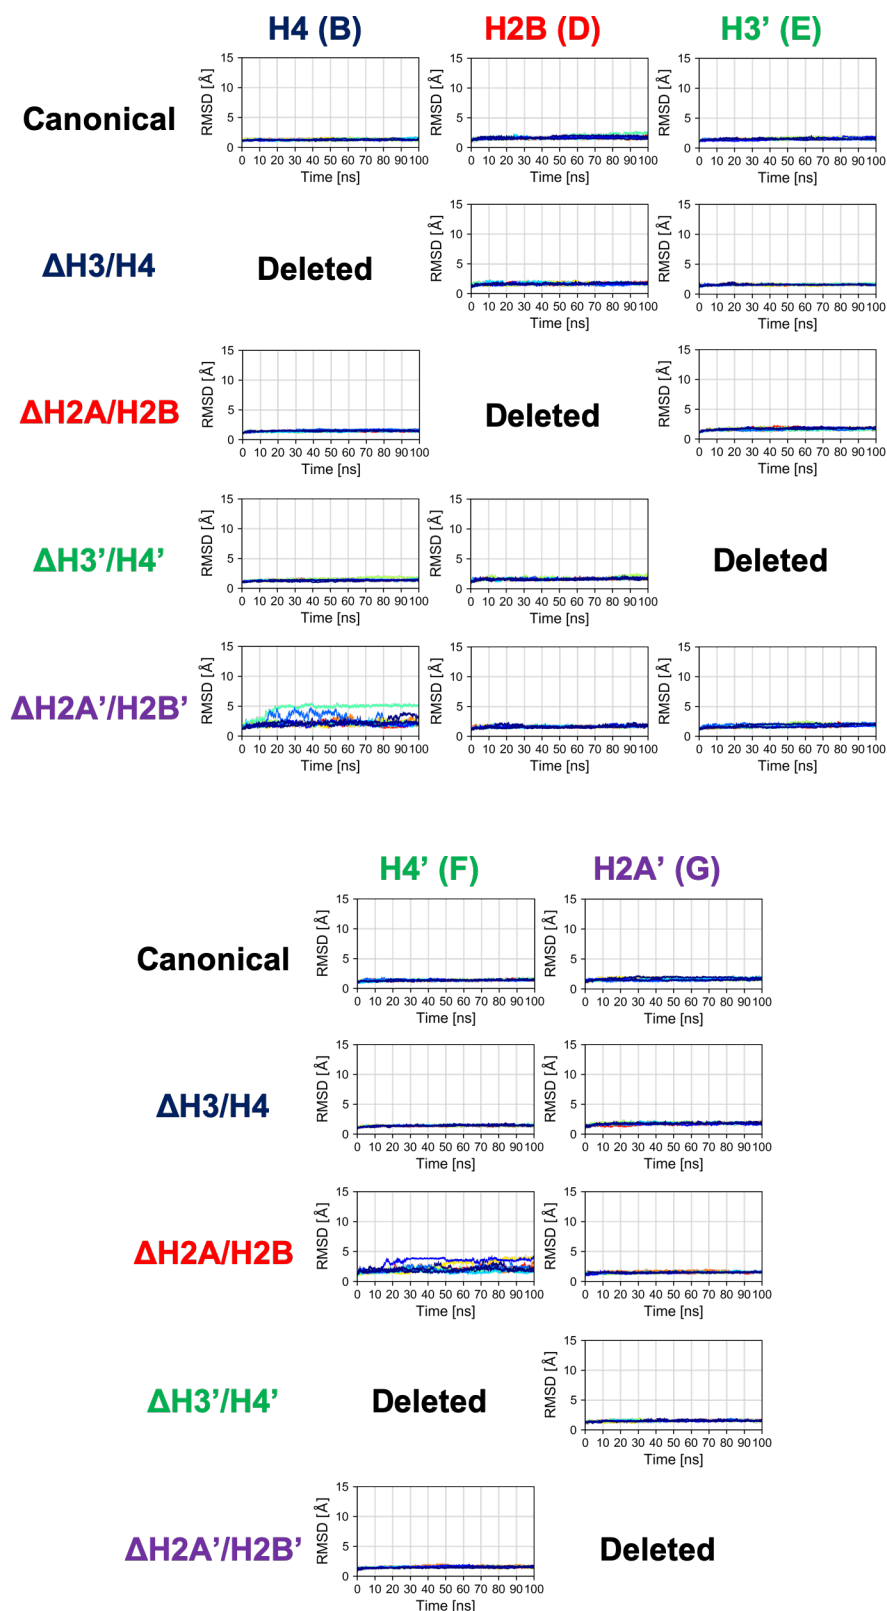

**Figure S2. Time Series of RMSD of Histone in Each Nucleosome.** Colors show different simulation trajectories (total 10). Note that histone H4 has a short C-terminal region which shows disordered conformation. This region usually interacts with H2A/H2B. When an H2A/H2B is absent, this region loses the interaction with the H2A/H2B and can fluctuate more, which causes the increase of RMSD in H4. The behavior is otherwise unaltered.

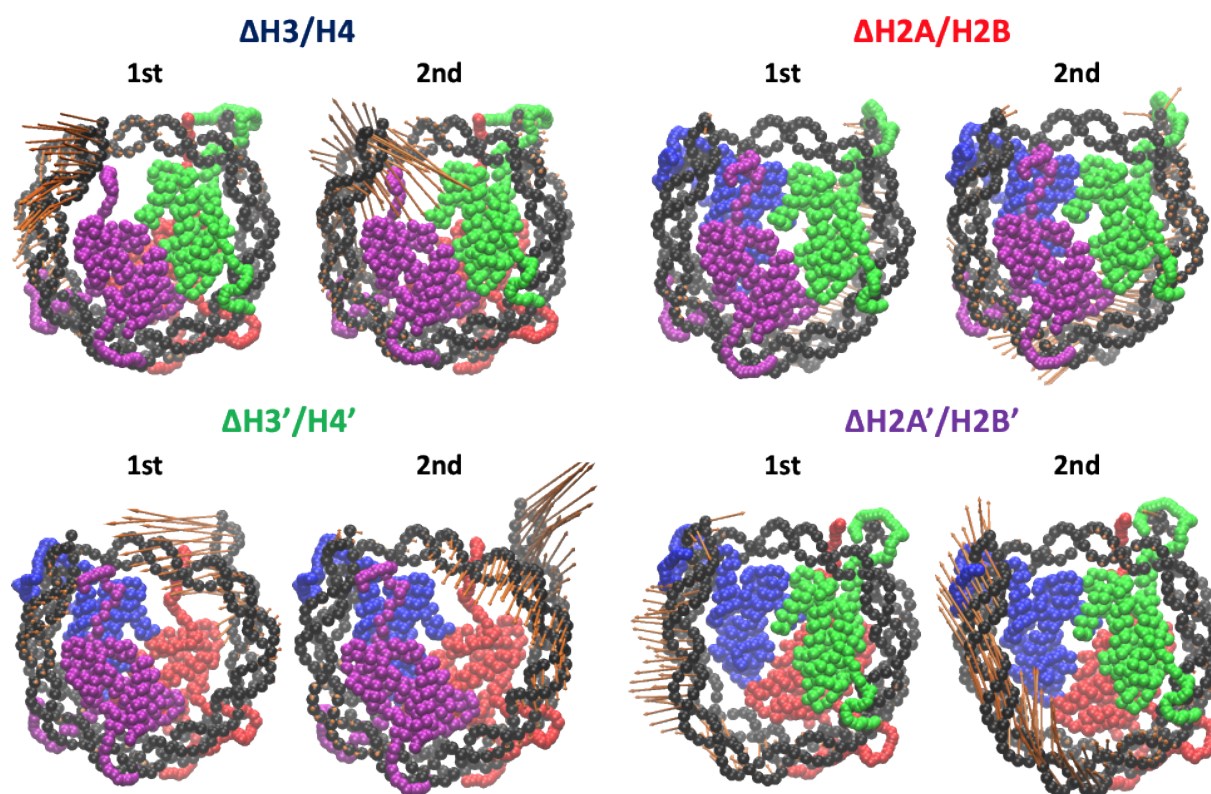

**Figure S3. Effective Directions of DNA Deformation (Back View).** Visualized from the side of chains E to H (H3', H4', H2A', and H2B'). Nucleotide (C1' of each nucleotide) and amino acid (C $^{\alpha}$  of each amino acid) coordinates are shown by spheres. Orange arrows show the vectors of the 1st and 2nd PC modes. Arrow lengths indicate the norm of the vector.

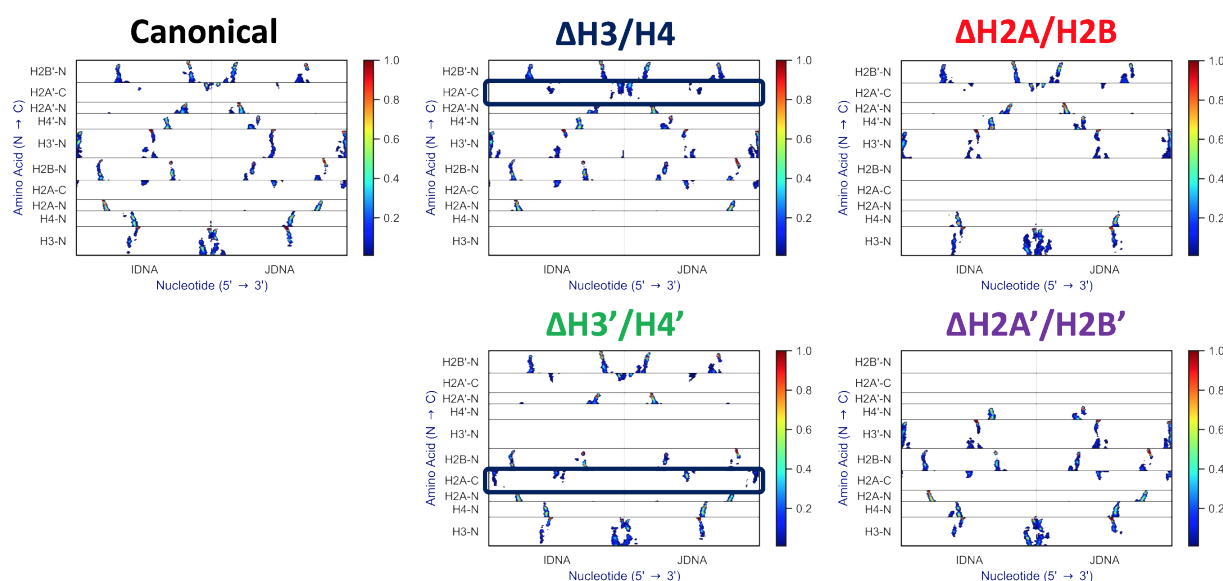

**Figure S4. Contact Matrix of DNA and Histone Tails.** Contact frequency of nucleotide of DNA and amino acid of histone tails.

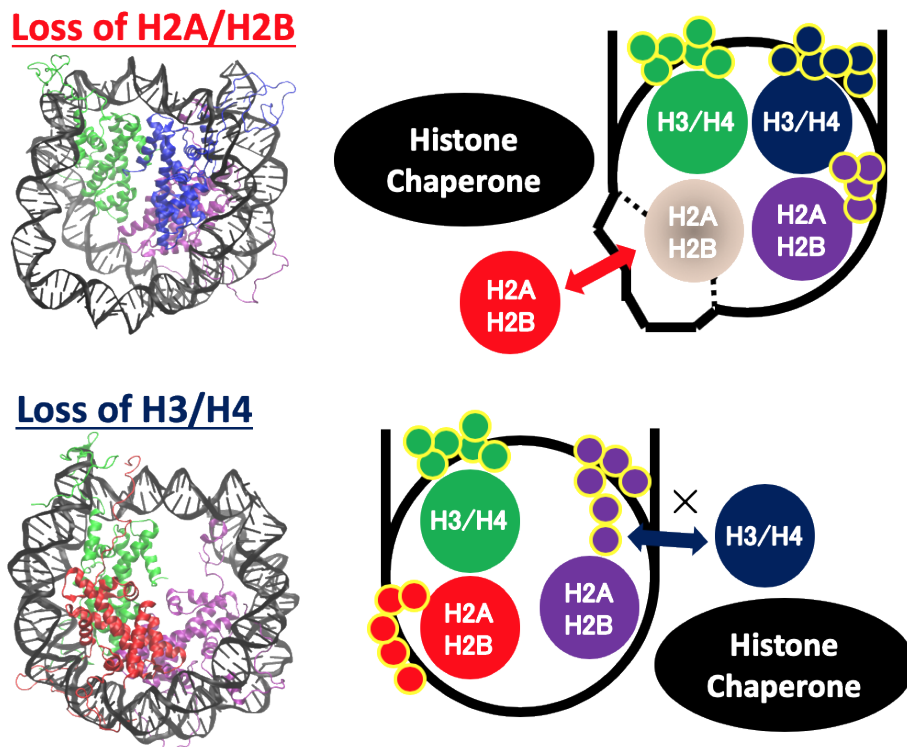

**Figure S5. Suggested Schematics of Nucleosome Remodeling based on the Results.** Schematics of histone dissociation and nucleosome remodeling by histone chaperone (like FACT). The relationship between partially disassembled nucleosome dynamics and the process of nucleosome remodeling is suggested.
